# Supplementary material for: Herbal molecule-mediated dual network hydrogels with adhesive and antibacterial properties for strain and pressure sensing
Source: Royal Society of Chemistry journal article supplement (doi:10.1039/d3ra00546a), 2023-01-01
Supplement: d3ra00546a1.pdf [file d3ra00546a1.pdf]

## Electronic Supplementary Information

Herbal molecules-mediated dual network hydrogels with adhesive and antibacterial properties for strain and pressure sensing

Hao Sun,<sup>a</sup> Zhibin Dong,<sup>a</sup> Xinyue Kou,<sup>a</sup> Qiaoqiao Zhao,<sup>b</sup> Lei Shi,<sup>\*a</sup> Yuning Ma<sup>\*a</sup> and Yuxia Ma<sup>\*a</sup>

<sup>a</sup> *Key Laboratory of New Material Research Institute, Institute of Pharmacy, Shandong University of Traditional Chinese Medicine, Jinan 250355, China*

<sup>b</sup> *Key Laboratory of Pulp and Paper Science & Technology of Ministry of Education, State Key Laboratory of Biobased Material and Green Papermaking, Faculty of Light Industry, Qilu University of Technology (Shandong Academy of Sciences), Jinan 250353, China*

### **\*Corresponding Authors**

Emails: 60230082@sducm.edu.cn (L.S.); myning0405@163.com (Y.M.); myxia1976@163.com (Y.M.)

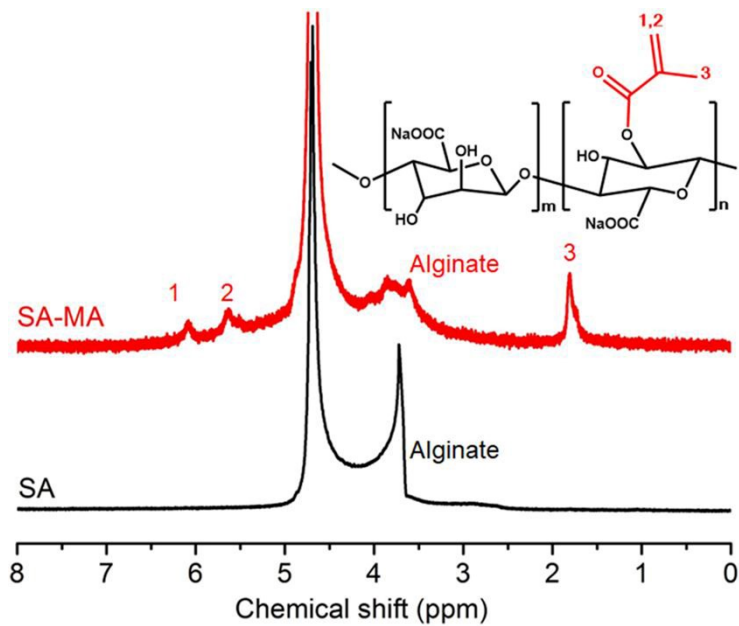

**Figure S1.**  $^1\text{H}$  NMR spectra of SA and SA-MA in  $\text{D}_2\text{O}$ .

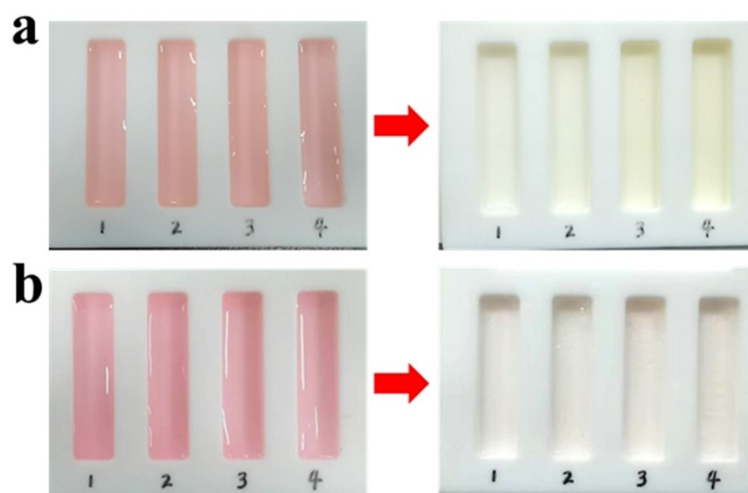

**Figure S2.** Photos showing the states of a) SA hydrogels and b) GA/SA DN hydrogels in the molds before and after photopolymerization.

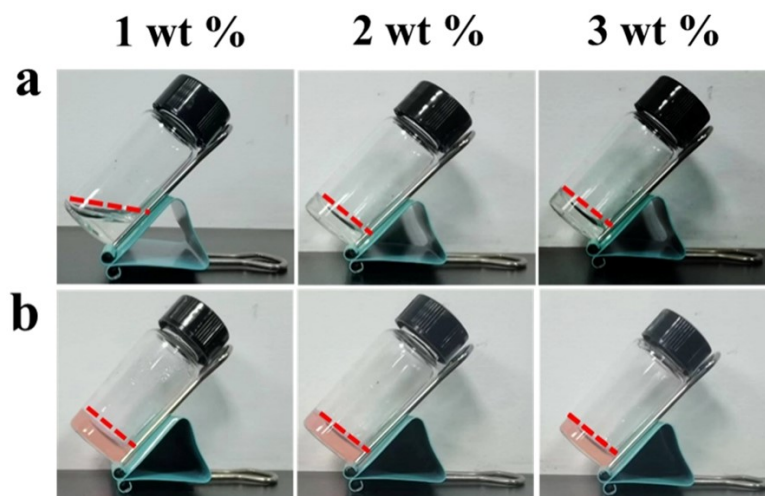

**Figure S3.** Photos showing the states of a) GA solutions after cooling to room temperature, and b) GA/SA DN hydrogel precursor solutions before photopolymerization.

**Table S1.** The gelation parameters of GA hydrogels and corresponding gelation times.

| Entry | GA (mg) | SA-MA (mg) | Eosin Y in 1-vinyl-2-pyrrolidinone ( $\mu\text{L}$ ) | triethanolamine ( $\mu\text{L}$ ) | gelation time (min) |
|-------|---------|------------|------------------------------------------------------|-----------------------------------|---------------------|
| 1     | 20      | 0          | 0                                                    | 0                                 | 7.3                 |
| 2     | 20      | 30         | 0                                                    | 0                                 | 4.8                 |
| 3     | 20      | 0          | 5                                                    | 0                                 | 7.5                 |
| 4     | 20      | 0          | 0                                                    | 5                                 | 9.7                 |
| 5     | 20      | 30         | 5                                                    | 5                                 | 7.6                 |

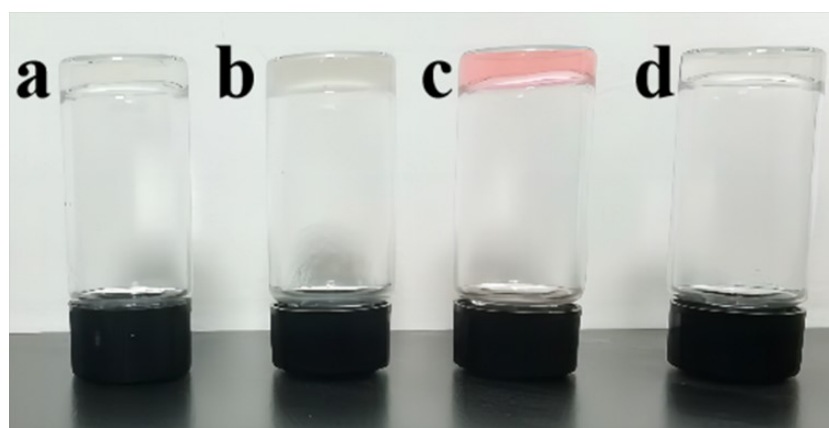

**Figure S4.** Photos showing the gelation states of a) pure GA hydrogel, and GA hydrogel after the addition of b) SA-MA, c) Eosin Y and 1-vinyl-2-pyrrolidinone, and d) triethanolamine.

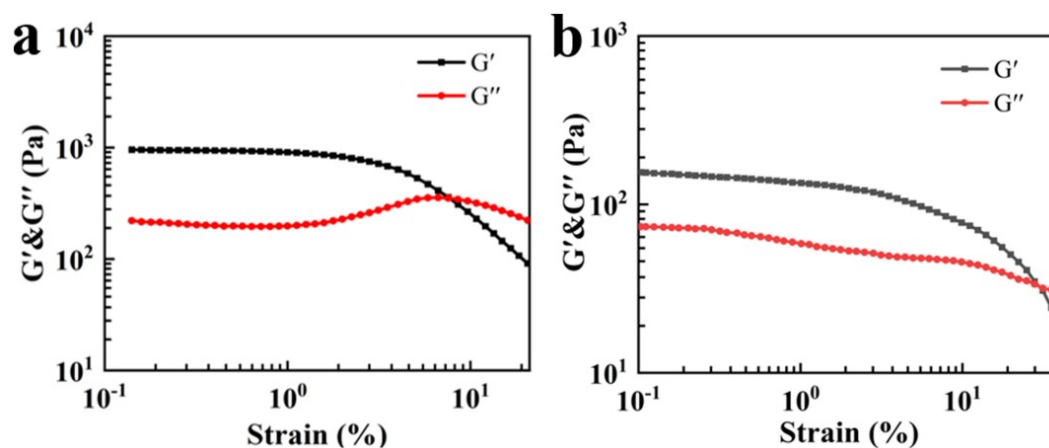

**Figure S5.**  $G'$  and  $G''$  of a) pure GA hydrogel and b) GA hydrogel containing the SA-MA, Eosin Y, 1-vinyl-2-pyrrolidinone and triethanolamine in oscillatory strain amplitude sweep tests.

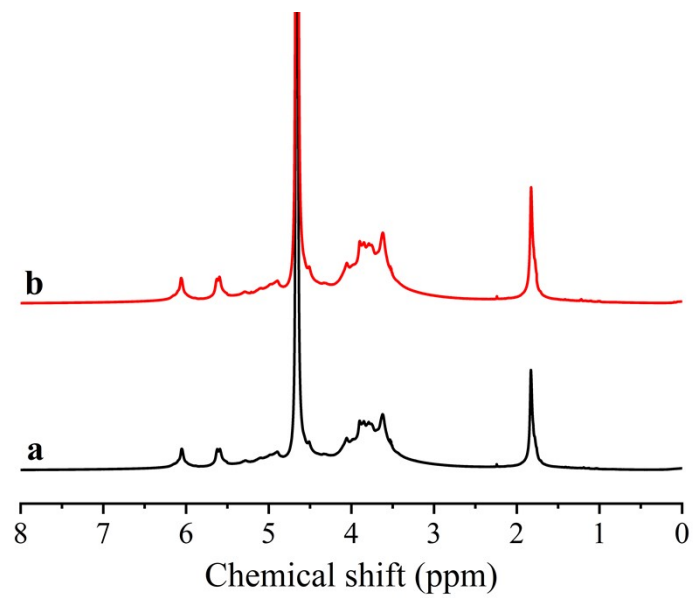

**Figure S6.** <sup>1</sup>H NMR spectra of a) dissolved SA-MA without heating and b) SA-MA sample after heating-cooling for three cycles in D<sub>2</sub>O.

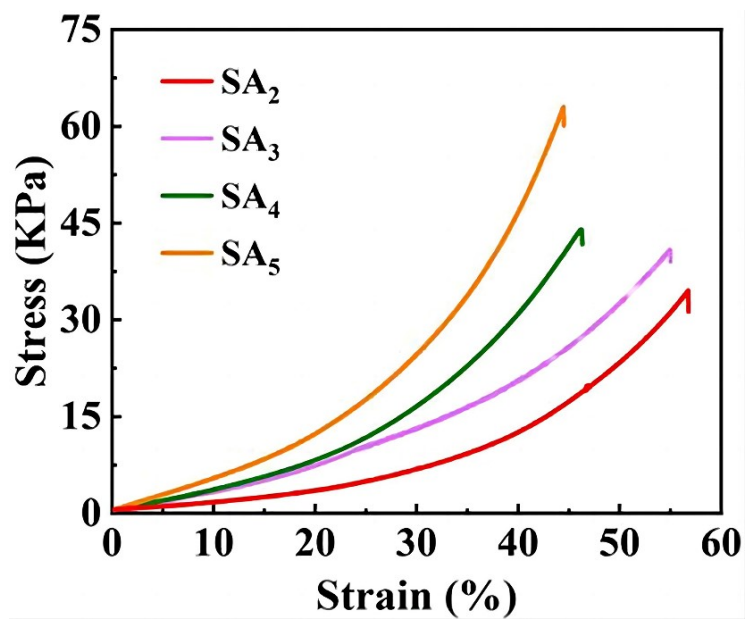

**Figure S7.** Tensile curves of SA hydrogels with different SA contents.

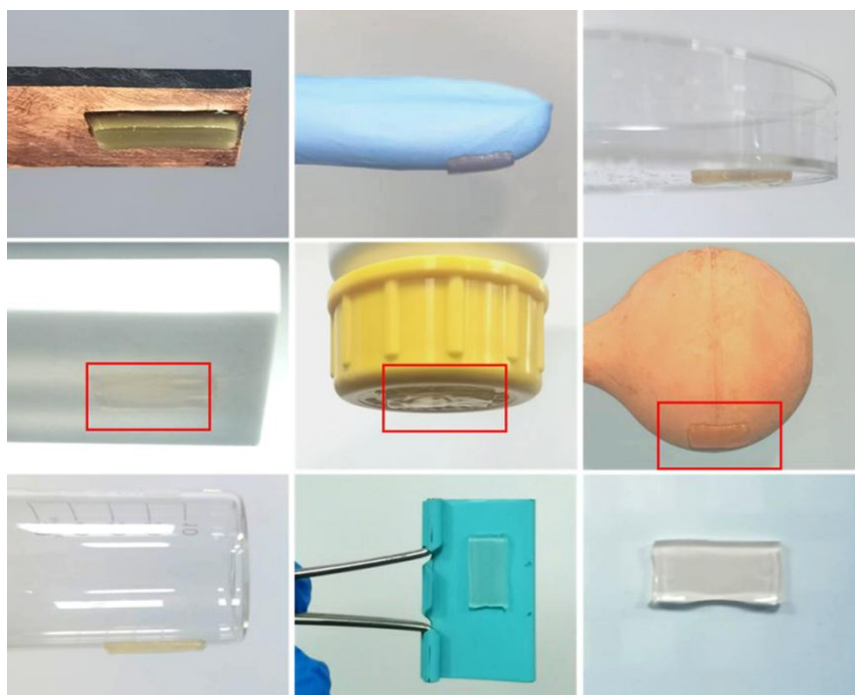

**Figure S8.** Images of the GA/SA<sub>3</sub> DN hydrogels that were adhered to various surfaces including wood, finger wearing laboratory glove, rubber suction bulb, polytetrafluoroethylene mold, plastic bottle cap, glass beaker, iron clip and paper.

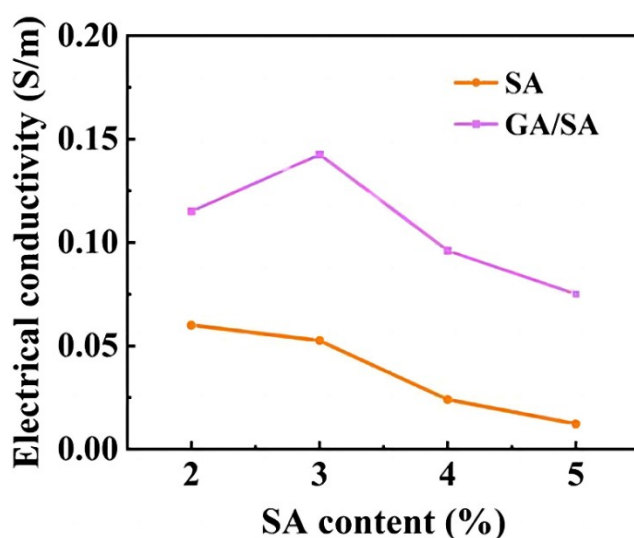

**Figure S9.** The electrical conductivities of SA hydrogels and GA/SA DN hydrogels.

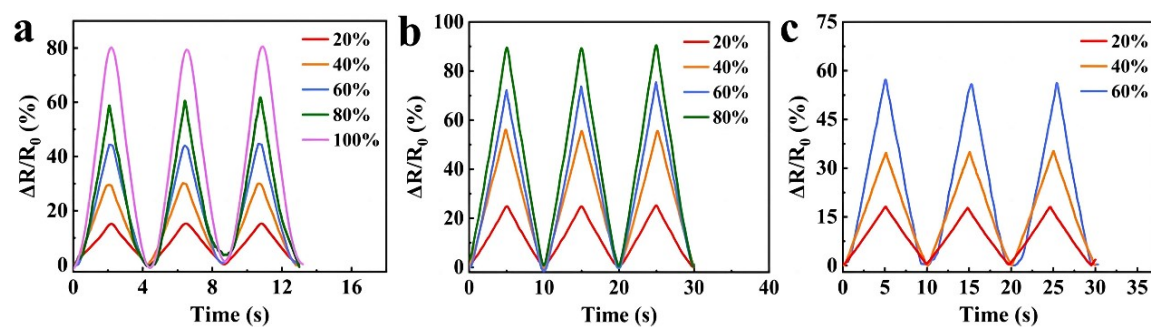

**Figure S10.** Relative resistance changes of a) the GA/SA<sub>2</sub> DN hydrogel, b) GA/SA<sub>4</sub> DN hydrogel, and c) GA/SA<sub>5</sub> DN hydrogel under different strains.

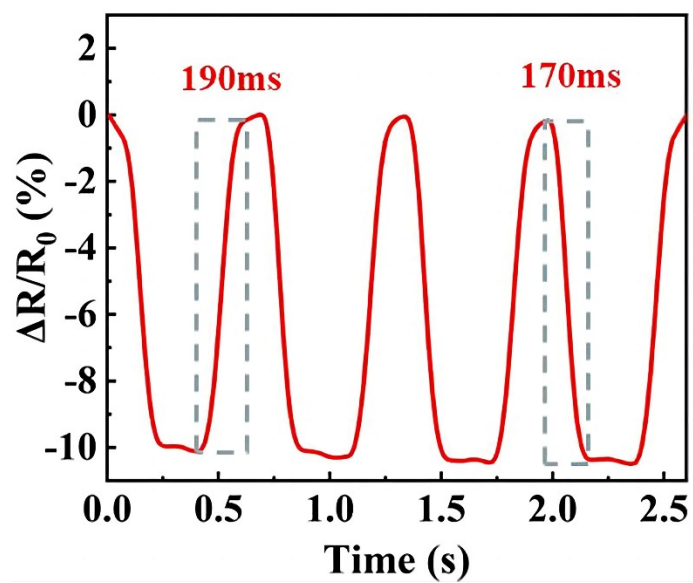

**Figure S11.** The response and relaxation times of GA/SA<sub>3</sub> DN hydrogel when compressed.
